# Supplementary material for: Is the regulation of the electronic properties of organic molecules by polynuclear superhalogens more effective than that by mononuclear superhalogens? A high-level ab initio case study
Source: Royal Society of Chemistry journal article supplement (doi:10.1039/c5cp03155a), 2015-01-01
Supplement: c5cp03155a1.pdf [file c5cp03155a1.pdf]

## Electronic Supplementary Information

### **Is the regulation of the electronic properties of organic molecules by polynuclear superhalogens more effective than that by mononuclear superhalogens? A high-level *ab initio* case study**

Miao-Miao Li<sup>a</sup>, Jin-Feng Li<sup>a</sup>, Hong-Cun Bai<sup>b</sup>, Yin-Yin Sun<sup>a</sup>, Jian-Li Li<sup>a</sup>, Bing Yin<sup>\*a</sup>

<sup>a</sup>MOE Key Laboratory of Synthetic and Natural Functional Molecule Chemistry, Shaanxi Key Laboratory of Physico-Inorganic Chemistry, College of Chemistry and Materials Science, Northwest University, Xi'an 710069, China. E-mail: [rayinyin@nwu.edu.cn](mailto:rayinyin@nwu.edu.cn)

<sup>b</sup>Key Laboratory of Energy Source and Chemical Engineering, State Key Laboratory Cultivation Base of Natural Gas Conversion, Ningxia University, Yinchuan, Ningxia 750021, China.

Table S1. Calculated VDEs of the composite anions under study at various theoretical levels (in eV).

|                                                 | OVGF                    | CCSD   | CCSD(T) |
|-------------------------------------------------|-------------------------|--------|---------|
|                                                 | AUG-CC-PVTZ             | TZVP++ |         |
| <b>A</b>                                        | 5.52(0.91) <sup>a</sup> | 4.62   | 4.65    |
| <b>B</b>                                        | 4.11(0.91)              | 3.83   | 3.88    |
| <b>C</b>                                        | 5.20(0.89)              | 5.30   | 5.35    |
| <b>A'</b>                                       | 5.81(0.90)              | 4.88   | 4.90    |
| <b>B'</b>                                       | 4.45(0.90)              | 4.14   | 4.18    |
| <b>C'</b>                                       | 5.42(0.89)              | -      | -       |
| <b>A1</b>                                       | 6.20 (0.91)             | 5.53   | 5.57    |
| <b>A2</b>                                       | 6.96(0.91)              | 6.41   | 6.42    |
| <b>A3</b>                                       | 5.72(0.91)              | 4.91   | 4.95    |
| <b>A1'</b>                                      | 6.43(0.90)              | 7.20   | 7.08    |
| <b>A2'</b>                                      | 7.08(0.90)              | 6.60   | 6.51    |
| <b>A3'</b>                                      | 6.08(0.90)              | 6.56   | 6.57    |
| <b>B1</b>                                       | 4.98(0.91)              | 4.72   | 4.77    |
| <b>B2</b>                                       | 5.86(0.91)              | 5.63   | 5.67    |
| <b>B1'</b>                                      | 5.24(0.90)              | 7.15   | 6.99    |
| <b>B2'</b>                                      | 5.96(0.90)              | 5.68   | 5.72    |
| <b>C1</b>                                       | 5.77(0.89)              | -      | -       |
| <b>C2</b>                                       | 6.37(0.89)              | 6.38   | 6.43    |
| <b>C3</b>                                       | 5.24(0.85)              | -      | -       |
| <b>C1'</b>                                      | 5.95(0.89)              | 7.41   | 7.32    |
| <b>C2'</b>                                      | 6.46(0.89)              | -      | -       |
| <b>C3'</b>                                      | 4.86(0.89)              | -      | -       |
| Mg <sub>2</sub> F <sub>5</sub> (T) <sup>b</sup> | 7.43(0.86)              | 8.92   | 8.82    |
| Mg <sub>2</sub> F <sub>5</sub> (D) <sup>c</sup> | 6.57(0.86)              | 7.99   | 7.93    |
| Mg <sub>2</sub> Cl <sub>5</sub> (T)             | 7.34(0.89)              | 7.38   | 7.22    |
| Mg <sub>2</sub> Cl <sub>5</sub> (D)             | 6.75(0.89)              | 6.78   | 6.70    |
| MgF <sub>3</sub>                                | 8.85(0.99)              | 7.60   | 7.61    |
| MgCl <sub>3</sub>                               | 6.72(0.91)              | 6.37   | 6.23    |

<sup>a</sup> Pole strength is shown in parenthesis.

<sup>b</sup> Triple-bridge structure.

<sup>c</sup> Double-bridge structure.

Point groups, lowest normal mode frequencies and optimized coordinates at MP2/6-311+G\* level of the anions **A-A3**, **A'-A3'**, **B-B2**, **B'-B2'**, **C-C3**, **C'-C3'**.

### A

Point group: Cs

Lowest normal mode frequency: 64.00 cm<sup>-1</sup> (A)

Optimized oordinates at MP2/6-311+G\* level:

|    |             |             |    |
|----|-------------|-------------|----|
| C  | 1.47356509  | -0.7682355  | 0. |
| H  | 1.72949239  | -1.83947842 | 0. |
| C  | 2.57131286  | 0.02999782  | 0. |
| H  | 3.60365896  | -0.34273489 | 0. |
| H  | 2.48372655  | 1.1178118   | 0. |
| Mg | -0.55406913 | -0.01779007 | 0. |
| F  | -0.82598565 | 1.82297885  | 0. |
| F  | -2.0003828  | -1.18883348 | 0. |

### A'

Point group: Cs

Lowest normal mode frequency: 60.93 cm<sup>-1</sup> (A')

Optimized oordinates at MP2/6-311+G\* level:

|    |             |             |    |
|----|-------------|-------------|----|
| C  | 2.77029522  | -1.23862448 | 0. |
| H  | 3.58747441  | -1.97004141 | 0. |
| H  | 3.09305512  | -0.19646409 | 0. |
| C  | 1.45535913  | -1.57190465 | 0. |
| H  | 1.28328926  | -2.65840712 | 0. |
| Mg | -0.11327617 | -0.12440726 | 0. |
| Cl | -2.32517708 | -0.74122718 | 0. |
| Cl | 0.44526938  | 2.10481391  | 0. |

## B

Point group: Cs

Lowest normal mode frequency: 21.02 cm<sup>-1</sup> (A'')

Optimized oordinates at MP2/6-311+G\* level:

|    |               |               |               |
|----|---------------|---------------|---------------|
| C  | 1.3617722512  | -0.8598793805 | 0.            |
| H  | 1.4553973009  | -1.5322115947 | 0.8695162292  |
| H  | 1.4553973009  | -1.5322115947 | -0.8695162292 |
| C  | 2.5497830616  | 0.1213985532  | 0.            |
| H  | 3.5393403425  | -0.366122385  | 0.            |
| H  | 2.5211631572  | 0.7806236216  | -0.8751892789 |
| H  | 2.5211631572  | 0.7806236216  | 0.8751892789  |
| Mg | -0.6434904548 | -0.0085309054 | 0.            |
| F  | -0.8915776496 | 1.8401730604  | 0.            |
| F  | -2.1352214871 | -1.1283443566 | 0.            |

## B'

Point group: Cs

Lowest normal mode frequency: 8.64 cm<sup>-1</sup> (A'')

Optimized oordinates at MP2/6-311+G\* level:

|    |               |               |               |
|----|---------------|---------------|---------------|
| C  | 1.4049703898  | -0.8769777787 | 0.            |
| H  | 1.4993874264  | -1.5480504065 | 0.8697182361  |
| H  | 1.4993874264  | -1.5480504065 | -0.8697182361 |
| C  | 2.5832128325  | 0.1146562299  | 0.            |
| H  | 3.5732405435  | -0.3693195656 | 0.            |
| H  | 2.550483884   | 0.7728658394  | -0.8753698965 |
| H  | 2.550483884   | 0.7728658394  | 0.8753698965  |
| Mg | -0.5786286671 | -0.043514827  | 0.            |
| Cl | -0.9178429266 | 2.2367630701  | 0.            |
| Cl | -2.4309678144 | -1.4157193559 | 0.            |

## C

Point group: Cs

Lowest normal mode frequency: 41.23 cm<sup>-1</sup> (A'')

Optimized oordinates at MP2/6-311+G\* level:

|    |             |             |             |
|----|-------------|-------------|-------------|
| C  | -0.00509979 | 1.0277178   | 1.19286123  |
| C  | -0.00454682 | 2.43304778  | 1.20737102  |
| C  | 0.02675     | 3.14303917  | 0.          |
| C  | -0.00454682 | 2.43304778  | -1.20737102 |
| C  | -0.00509979 | 1.0277178   | -1.19286123 |
| C  | -0.03567894 | 0.26223917  | 0.          |
| H  | -0.02200764 | 0.5093429   | 2.15382521  |
| H  | 0.0189353   | 2.9723959   | 2.15536209  |
| H  | 0.02740698  | 4.23288317  | 0.          |
| H  | 0.0189353   | 2.9723959   | -2.15536209 |
| H  | -0.02200764 | 0.5093429   | -2.15382521 |
| Mg | -0.00489289 | -1.91198783 | 0.          |
| F  | 0.0113559   | -2.78984559 | -1.63454433 |
| F  | 0.0113559   | -2.78984559 | 1.63454433  |

## C'

Point group: Cs

Lowest normal mode frequency: 37.74 cm<sup>-1</sup> (A'')

Optimized oordinates at MP2/6-311+G\* level:

|    |               |               |               |
|----|---------------|---------------|---------------|
| C  | -0.0109790288 | 1.0516353312  | 1.1950007032  |
| C  | -0.0041060917 | 2.456297032   | 1.2079162128  |
| C  | 0.0300181071  | 3.1650873927  | 0.            |
| C  | -0.0041060917 | 2.456297032   | -1.2079162128 |
| C  | -0.0109790288 | 1.0516353312  | -1.1950007032 |
| C  | -0.0492069661 | 0.2915888402  | 0.            |
| H  | -0.0295786693 | 0.5320112538  | 2.1550166973  |
| H  | 0.0228198069  | 2.996185858   | 2.1551561974  |
| H  | 0.0367310695  | 4.254724544   | 0.            |
| H  | 0.0228198069  | 2.996185858   | -2.1551561974 |
| H  | -0.0295786693 | 0.5320112538  | -2.1550166973 |
| Mg | -0.0050892702 | -1.8533552128 | 0.            |
| Cl | 0.0210472427  | -2.9494067161 | -2.0081944837 |
| Cl | 0.0210472427  | -2.9494067161 | 2.0081944837  |

## A1

Point group: Cs

Lowest normal mode frequency: 26.09 cm<sup>-1</sup> (A'')

Optimized oordinates at MP2/6-311+G\* level:

|    |               |               |               |
|----|---------------|---------------|---------------|
| Mg | 1.6989188735  | 0.0752883348  | 0.            |
| Mg | -0.8684172929 | -0.2410319416 | 0.            |
| F  | 3.5155797781  | 0.3012412101  | 0.            |
| F  | 0.2401062411  | 1.4132591127  | 0.            |
| F  | 0.5203582289  | -0.8328792101 | -1.3021038761 |
| F  | 0.5203582289  | -0.8328792101 | 1.3021038761  |
| C  | -2.9901061754 | -0.4527265528 | 0.            |
| C  | -3.8517945161 | 0.595218715   | 0.            |
| H  | -3.5092130432 | -1.4226466791 | 0.            |
| H  | -3.5035034045 | 1.6295266591  | 0.            |
| H  | -4.9422646831 | 0.4878858213  | 0.            |

## A1'

Point group: Cs

Lowest normal mode frequency: 26.81 cm<sup>-1</sup> (A'')

Optimized oordinates at MP2/6-311+G\* level:

|    |               |               |               |
|----|---------------|---------------|---------------|
| Mg | 1.840304975   | 0.0797259237  | 0.            |
| Mg | -1.0168606069 | -0.2702905068 | 0.            |
| Cl | 4.0654769208  | 0.3617644362  | 0.            |
| Cl | 0.1952123783  | 1.8578582045  | 0.            |
| Cl | 0.5622761491  | -1.0746094848 | -1.6990294146 |
| Cl | 0.5622761491  | -1.0746094848 | 1.6990294146  |
| C  | -3.1194411623 | -0.4634670675 | 0.            |
| C  | -3.9627995724 | 0.5985571033  | 0.            |
| H  | -3.6450729279 | -1.4286451905 | 0.            |
| H  | -3.5971725422 | 1.6266396383  | 0.            |
| H  | -5.0541775311 | 0.5073326884  | 0.            |

## A2

Point group: Cs

Lowest normal mode frequency: 23.62 cm<sup>-1</sup> (A'')

Optimized oordinates at MP2/6-311+G\* level:

|    |               |               |               |
|----|---------------|---------------|---------------|
| Mg | 0.0700208605  | 1.7594818364  | 0.            |
| Mg | -0.2650574955 | -1.1586044901 | 0.            |
| F  | 1.1826823644  | 0.0547055016  | 0.            |
| F  | -1.399617141  | 0.351441042   | 0.            |
| F  | 0.1604837263  | 2.5604525636  | 1.6670408574  |
| F  | 0.1604837263  | 2.5604525636  | -1.6670408574 |
| C  | -0.4775810607 | -3.2607566303 | 0.            |
| H  | -1.4473148568 | -3.7755325101 | 0.            |
| C  | 0.5785576017  | -4.1111670793 | 0.            |
| H  | 1.6098620745  | -3.7561906902 | 0.            |
| H  | 0.4761912476  | -5.2007801833 | 0.            |

## A2'

Point group: Cs

Lowest normal mode frequency: 8.33 cm<sup>-1</sup> (A'')

Optimized oordinates at MP2/6-311+G\* level:

|    |               |               |               |
|----|---------------|---------------|---------------|
| Mg | 0.0870161594  | 1.9773767559  | 0.            |
| Mg | -0.3223731936 | -1.3478313937 | 0.            |
| Cl | 1.587877723   | -0.0234095562 | 0.            |
| Cl | -1.8538637582 | 0.3965731     | 0.            |
| Cl | 0.2015891084  | 2.9553861316  | 2.0452066998  |
| Cl | 0.2015891084  | 2.9553861316  | -2.0452066998 |
| C  | -0.5005826043 | -3.4416956714 | 0.            |
| H  | -1.4558620096 | -3.9813930637 | 0.            |
| C  | 0.5836171864  | -4.2556320752 | 0.            |
| H  | 1.6018265667  | -3.8646638604 | 0.            |
| H  | 0.5179447011  | -5.3478668137 | 0.            |

### A3

Point group: Cs

Lowest normal mode frequency: 14.56 cm<sup>-1</sup> (A')

Optimized oordinates at MP2/6-311+G\* level:

|    |                 |                 |                 |
|----|-----------------|-----------------|-----------------|
| Mg | -0.323094000000 | -1.963802000000 | 0.000000000000  |
| Mg | -0.077460000000 | 0.958436000000  | 0.000000000000  |
| F  | -0.077460000000 | -0.634818000000 | 1.300707000000  |
| F  | -0.077460000000 | -0.634818000000 | -1.300707000000 |
| F  | -0.563989000000 | -3.763786000000 | 0.000000000000  |
| F  | -1.825789000000 | 1.587950000000  | 0.000000000000  |
| C  | 1.748334000000  | 2.099594000000  | 0.000000000000  |
| C  | 1.804824000000  | 3.455708000000  | 0.000000000000  |
| H  | 2.751412000000  | 1.643188000000  | 0.000000000000  |
| H  | 0.900359000000  | 4.066841000000  | 0.000000000000  |
| H  | 2.738198000000  | 4.031807000000  | 0.000000000000  |

### A3'

Point group: Cs

Lowest normal mode frequency: 11.38 cm<sup>-1</sup> (A')

Optimized oordinates at MP2/6-311+G\* level:

|    |               |               |               |
|----|---------------|---------------|---------------|
| Mg | -0.3139701901 | -2.189252592  | 0.            |
| Mg | -0.062334628  | 1.1532593873  | 0.            |
| Cl | -0.0122121708 | -0.7184535151 | 1.7372346289  |
| Cl | -0.0122121708 | -0.7184535151 | -1.7372346289 |
| Cl | -0.6451078449 | -4.3903841831 | 0.            |
| Cl | -2.222928981  | 1.8967995705  | 0.            |
| C  | 1.7746774741  | 2.2171726722  | 0.            |
| C  | 1.8872854777  | 3.5687392442  | 0.            |
| H  | 2.7498700133  | 1.707153035   | 0.            |
| H  | 1.0100609599  | 4.2178447182  | 0.            |
| H  | 2.8447420575  | 4.1018751759  | 0.            |



## B1

Point group: Cs

Lowest normal mode frequency: 11.86 cm<sup>-1</sup> (A'')

Optimized oordinates at MP2/6-311+G\* level:

|    |               |               |               |
|----|---------------|---------------|---------------|
| Mg | -1.7906459892 | 0.0881040164  | 0.            |
| Mg | 0.7749789463  | -0.2750633482 | 0.            |
| F  | -3.6046035986 | 0.3411946079  | 0.            |
| F  | -0.4205564705 | 0.6560273922  | 1.3055717049  |
| F  | -0.7358205191 | -1.5839444387 | 0.            |
| F  | -0.4205564705 | 0.6560273922  | -1.3055717049 |
| C  | 2.900922398   | -0.5693011749 | 0.            |
| H  | 3.177339289   | -1.1848341002 | 0.8712775908  |
| H  | 3.177339289   | -1.1848341002 | -0.8712775908 |
| C  | 3.7752330228  | 0.7017216624  | 0.            |
| H  | 4.8570144046  | 0.4957169471  | 0.            |
| H  | 3.5736174165  | 1.3261766878  | 0.8780224255  |
| H  | 3.5736174165  | 1.3261766878  | -0.8780224255 |

## B1'

Point group: Cs

Lowest normal mode frequency: 21.45 cm<sup>-1</sup> (A'')

Optimized oordinates at MP2/6-311+G\* level:

|    |               |               |               |
|----|---------------|---------------|---------------|
| Mg | -1.9337469397 | 0.111342869   | 0.            |
| Mg | 0.9160426629  | -0.3415646691 | 0.            |
| Cl | -4.1535223173 | 0.448037679   | 0.            |
| Cl | -0.3938589802 | 0.8639514814  | 1.7041125947  |
| Cl | -0.8496486706 | -2.0520234456 | 0.            |
| Cl | -0.3938589802 | 0.8639514814  | -1.7041125947 |
| C  | 3.0252244368  | -0.6017593221 | 0.            |
| H  | 3.3223339675  | -1.2038993932 | 0.8727660547  |
| H  | 3.3223339675  | -1.2038993932 | -0.8727660547 |
| C  | 3.8370014345  | 0.7096573551  | 0.            |
| H  | 4.9261507748  | 0.5521328428  | 0.            |
| H  | 3.6067138946  | 1.3236203691  | 0.878127908   |
| H  | 3.6067138946  | 1.3236203691  | -0.878127908  |

## B2

Point group: Cs

Lowest normal mode frequency: 18.15 cm<sup>-1</sup> (A'')

Optimized oordinates at MP2/6-311+G\* level:

|    |               |               |               |
|----|---------------|---------------|---------------|
| Mg | -1.8637384893 | -0.0000000268 | 0.0803943259  |
| Mg | 1.0538053878  | -0.0000000052 | -0.2977078049 |
| F  | -2.6689429858 | 1.6655905742  | 0.1840637278  |
| F  | -0.1470751119 | -0.0000000141 | 1.1669576996  |
| F  | -2.668942961  | -1.6655906398 | 0.1840637278  |
| F  | -0.4802593216 | -0.0000000166 | -1.4077998927 |
| C  | 3.1683709255  | 0.0000000106  | -0.575558619  |
| H  | 3.4392705468  | 0.8699228914  | -1.1934940837 |
| H  | 3.4392705597  | -0.8699228663 | -1.1934940837 |
| C  | 4.0408475118  | 0.000000017   | 0.6957603055  |
| H  | 3.842449833   | -0.8772866713 | 1.3207961314  |
| H  | 3.8424498199  | 0.8772867024  | 1.3207961314  |
| H  | 5.1189153979  | 0.000000025   | 0.4796634336  |

## B2'

Point group: Cs

Lowest normal mode frequency: 5.64 cm<sup>-1</sup> (A'')

Optimized oordinates at MP2/6-311+G\* level:

|    |               |               |               |
|----|---------------|---------------|---------------|
| Mg | -2.1176084973 | -0.0000000287 | 0.0933397181  |
| Mg | 1.2194675793  | -0.000000004  | -0.3328774104 |
| Cl | -3.1016626071 | 2.0434931819  | 0.2181387697  |
| Cl | -0.1117301406 | -0.0000000138 | 1.58132167    |
| Cl | -3.1016625768 | -2.0434932539 | 0.2181387697  |
| Cl | -0.5504337299 | -0.0000000171 | -1.8493765645 |
| C  | 3.3261118619  | 0.0000000117  | -0.5915019804 |
| H  | 3.6053385274  | 0.8701501858  | -1.2048779477 |
| H  | 3.6053385403  | -0.8701501583 | -1.2048779477 |
| C  | 4.1710924522  | 0.0000000179  | 0.6975625234  |
| H  | 3.9596179593  | -0.8772505918 | 1.3181511084  |
| H  | 3.9596179463  | 0.8772506246  | 1.3181511084  |
| H  | 5.2529337936  | 0.000000026   | 0.5031491819  |

## C1

Point group: C1

Lowest normal mode frequency: 10.84 cm<sup>-1</sup> (A)

Optimized oordinates at MP2/6-311+G\* level:

|    |               |               |               |
|----|---------------|---------------|---------------|
| Mg | -0.0366885974 | -0.0334565403 | -0.4690671125 |
| Mg | 0.0696694406  | -0.0101533372 | -3.0478549386 |
| F  | -0.8634317644 | 1.1996548918  | -1.7877073453 |
| F  | 1.5145141778  | 0.1245180025  | -1.6956595762 |
| F  | -0.6122488167 | -1.3891529217 | -1.8014022287 |
| F  | 0.1520380832  | 0.0068878913  | -4.8747625852 |
| C  | -0.0410703099 | -0.0407941783 | 1.6770168473  |
| C  | 1.1553543008  | 0.1438384805  | 2.4153409459  |
| C  | 1.1958785718  | 0.178660161   | 3.8189674321  |
| C  | 0.0079519392  | 0.080844651   | 4.5534688864  |
| C  | -1.2010358613 | -0.1032801376 | 3.8713769404  |
| C  | -1.2140816252 | -0.1343348351 | 2.4673666223  |
| H  | 2.1055647784  | 0.2296594507  | 1.8839509718  |
| H  | 2.1450107862  | 0.321754445   | 4.3359551309  |
| H  | 0.0285092927  | 0.1075669892  | 5.6422536465  |
| H  | -2.1343458193 | -0.1810215346 | 4.4294881424  |
| H  | -2.1811699063 | -0.2737904581 | 1.9794150806  |

## C1'

Point group: Cs

Lowest normal mode frequency: 10.28 cm<sup>-1</sup> (A'')

Optimized oordinates at MP2/6-311+G\* level:

|    |               |               |               |
|----|---------------|---------------|---------------|
| Mg | 0.0216980662  | -0.0266271839 | -0.3645167068 |
| Mg | 0.0324044005  | -0.0175003025 | -3.2308393192 |
| Cl | -0.5154914166 | 1.8686967704  | -1.8196476675 |
| Cl | 1.9373394152  | -0.4849924995 | -1.800430443  |
| Cl | -1.3470035709 | -1.427499969  | -1.8144164074 |
| Cl | 0.0470015455  | -0.0363359373 | -5.4718748294 |
| C  | 0.0172969898  | -0.0362342778 | 1.7567318518  |
| C  | 1.1521970281  | 0.3320378484  | 2.520447628   |
| C  | 1.1483169351  | 0.3766753075  | 3.9237445434  |
| C  | -0.0263523472 | 0.083316473   | 4.6272331489  |
| C  | -1.1740550283 | -0.288051     | 3.9161303482  |
| C  | -1.1452007441 | -0.3255287763 | 2.5129134184  |
| H  | 2.0892354907  | 0.5683776158  | 2.0119299271  |
| H  | 2.0492058344  | 0.6655301653  | 4.465090202   |
| H  | -0.0392626605 | 0.1159426236  | 5.7158193008  |
| H  | -2.0946164983 | -0.5205178211 | 4.451495409   |
| H  | -2.0622947694 | -0.6198880166 | 1.9983364559  |

## C2

Point group: Cs

Lowest normal mode frequency: 18.86 cm<sup>-1</sup> (A')

Optimized oordinates at MP2/6-311+G\* level:

|    |               |               |               |
|----|---------------|---------------|---------------|
| Mg | -0.0243952367 | 3.1551330373  | 0.            |
| Mg | 0.0254538907  | 0.2248292526  | 0.            |
| F  | -0.0036977735 | 1.5860112288  | -1.3024876505 |
| F  | -0.0036977735 | 1.5860112288  | 1.3024876505  |
| F  | -1.7020881766 | 3.9348818774  | 0.            |
| F  | 1.6380514627  | 3.9675426126  | 0.            |
| C  | 0.0237719021  | -2.6596775076 | 1.1964604036  |
| C  | 0.0075361998  | -4.0632265571 | 1.207783447   |
| C  | -0.0274008645 | -4.7702530399 | 0.            |
| C  | 0.0075361998  | -4.0632265571 | -1.207783447  |
| C  | 0.0237719021  | -2.6596775076 | -1.1964604036 |
| C  | 0.0606368199  | -1.9012600974 | 0.            |
| H  | 0.0453556707  | -2.1486119117 | 2.160699768   |
| H  | -0.0191494832 | -4.6015638799 | 2.1547532988  |
| H  | -0.04209336   | -5.8590465104 | 0.            |
| H  | -0.0191494832 | -4.6015638799 | -2.1547532988 |
| H  | 0.0453556707  | -2.1486119117 | -2.160699768  |

## C2'

Point group: Cs

Lowest normal mode frequency: 4.44 cm<sup>-1</sup> (A')

Optimized oordinates at MP2/6-311+G\* level:

|    |               |               |               |
|----|---------------|---------------|---------------|
| Mg | -0.0220120888 | 3.4374331312  | 0.            |
| Mg | 0.0172605324  | 0.1025953806  | 0.            |
| Cl | -0.013824221  | 1.6296639826  | -1.7403069303 |
| Cl | -0.013824221  | 1.6296639826  | 1.7403069303  |
| Cl | -2.07124337   | 4.4071659652  | 0.            |
| Cl | 2.0254410944  | 4.4123557378  | 0.            |
| C  | 0.0167789045  | -2.7657106413 | 1.1974519729  |
| C  | 0.0121504731  | -4.169065401  | 1.2083052355  |
| C  | -0.0174335098 | -4.8757482674 | 0.            |
| C  | 0.0121504731  | -4.169065401  | -1.2083052355 |
| C  | 0.0167789045  | -2.7657106413 | -1.1974519729 |
| C  | 0.0460893096  | -2.0099191634 | 0.            |
| H  | 0.0347623462  | -2.2523837386 | 2.1606067941  |
| H  | -0.00930809   | -4.7083210146 | 2.1547832014  |
| H  | -0.0234232277 | -5.9645592322 | 0.            |
| H  | -0.00930809   | -4.7083210146 | -2.1547832014 |
| H  | 0.0347623462  | -2.2523837386 | -2.1606067941 |

### C3

Point group: C1

Lowest normal mode frequency: 12.11 cm<sup>-1</sup> (A)

Optimized oordinates at MP2/6-311+G\* level:

|    |               |               |               |
|----|---------------|---------------|---------------|
| Mg | -0.1507584291 | -0.6405775294 | -1.0894228744 |
| Mg | 2.027371369   | 0.1823839225  | 0.6983200976  |
| F  | 1.2091624263  | 0.8682887581  | -0.8498162336 |
| F  | 0.8678324826  | -1.286629654  | 0.5649758376  |
| F  | 3.3688158367  | 0.7099581199  | 1.7987519504  |
| F  | 0.2461803811  | -1.7392407021 | -2.5215288846 |
| C  | -4.4476347441 | 0.0906952959  | 0.1755693958  |
| C  | -3.2642030977 | -0.4920280507 | -0.3084208517 |
| C  | -2.0431518944 | 0.2153032562  | -0.446844497  |
| C  | -2.1012848043 | 1.5665451086  | -0.0178998717 |
| C  | -3.2696327198 | 2.1762758444  | 0.4708220089  |
| C  | -4.4471807351 | 1.4282366436  | 0.5915955785  |
| H  | -5.357840248  | -0.5044219268 | 0.2595721226  |
| H  | -3.3132415148 | -1.5382921359 | -0.6189874289 |
| H  | -1.2070254722 | 2.1886336046  | -0.1005433486 |
| H  | -3.2540881217 | 3.2207910761  | 0.7847925368  |
| H  | -5.3591451245 | 1.8899461189  | 0.9689389525  |

### C3'

Point group: C1

Lowest normal mode frequency: 7.08 cm<sup>-1</sup> (A)

Optimized oordinates at MP2/6-311+G\* level:

|    |               |               |               |
|----|---------------|---------------|---------------|
| Mg | -0.319062342  | -0.7520674128 | -0.863164656  |
| Mg | 2.5289091325  | 0.3503182639  | 0.539685468   |
| Cl | 1.4133749127  | 1.0236668388  | -1.3571852097 |
| Cl | 0.9975506631  | -1.1969324623 | 1.266070971   |
| Cl | 4.4567478133  | 1.0457354555  | 1.4014291167  |
| Cl | -0.0070687564 | -2.5424557494 | -2.2334291244 |
| C  | -4.6193788104 | 0.1900850037  | -0.113106381  |
| C  | -3.409615005  | -0.4060112262 | -0.5057787967 |
| C  | -2.1501403643 | 0.2256594035  | -0.3565738107 |
| C  | -2.1935005187 | 1.4949702605  | 0.270838239   |
| C  | -3.3886687038 | 2.1150325414  | 0.6697553117  |
| C  | -4.6087886795 | 1.4475485976  | 0.5032252266  |
| H  | -5.5622993039 | -0.3393492659 | -0.2525776536 |
| H  | -3.4617432141 | -1.3870826075 | -0.982655048  |
| H  | -1.2650274779 | 2.0519594804  | 0.4168422872  |
| H  | -3.3657343426 | 3.0961807983  | 1.1448180794  |
| H  | -5.5413794131 | 1.9186098305  | 0.8116804706  |
